# Supplementary material for: A bubble-template approach for assembling Ni–Co oxide hollow microspheres with an enhanced electrochemical performance as an anode for lithium ion batteries
Source: Royal Society of Chemistry journal article supplement (doi:10.1039/c6cp04097g), 2016-01-01
Supplement: c6cp04097g1.pdf [file c6cp04097g1.pdf]

## Supporting Information

### **Bubble-Template Approach to Assemble Ni-Co Oxide Hollow Microspheres with Enhanced Electrochemical Performance as Anode for Lithium Ion Batteries**

Caihua Ding<sup>a</sup>, Dong Yan<sup>b</sup>, Yongjie Zhao<sup>a,\*</sup>, Yuzhen Zhao<sup>c</sup>, Heping Zhou<sup>c</sup>, Jingbo Li<sup>a</sup> and  
Haibo Jin<sup>a,\*</sup>

<sup>a</sup> Beijing Key Laboratory of Construction Tailorable Advanced Functional Materials and Green Applications, School of Materials Science & Engineering, Beijing Institute of Technology, Beijing, 100081, China

<sup>b</sup> School of Mechanical Engineering, Tsinghua University, Beijing, 100084, PR China

<sup>c</sup> State Key Laboratory of New Ceramics and Fine Processing, School of Materials Science and Engineering, Tsinghua University, Beijing, 100084, PR China

\*Corresponding Author: [zhaoyjpeace@gmail.com](mailto:zhaoyjpeace@gmail.com) and [hbjin@bit.edu.cn](mailto:hbjin@bit.edu.cn)

Caihua Ding and Dong Yan have the equal contribution to this paper.

## Content

**Fig. S1.** (a) Cyclic performance of the pure NiO at a current density of 300 mA g<sup>-1</sup>. (b) Rate performance of pure NiO at various current densities.

**Fig. S2.** Nyquist plots of Ni-Co oxide and pure NiO at as-prepared (before cycling).

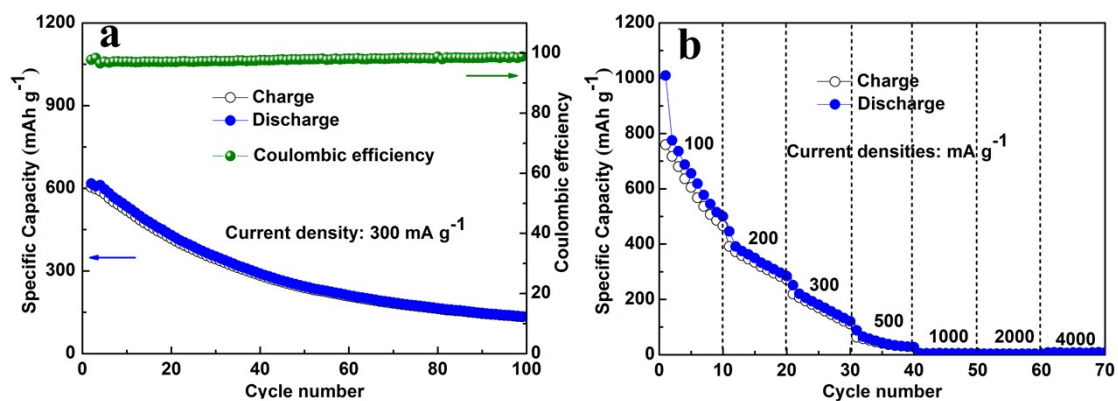

**Fig. S1.** (a) Cyclic performance of the pure NiO at a current density of  $300 \text{ mA g}^{-1}$ . (b) Rate performance of pure NiO at various current densities.

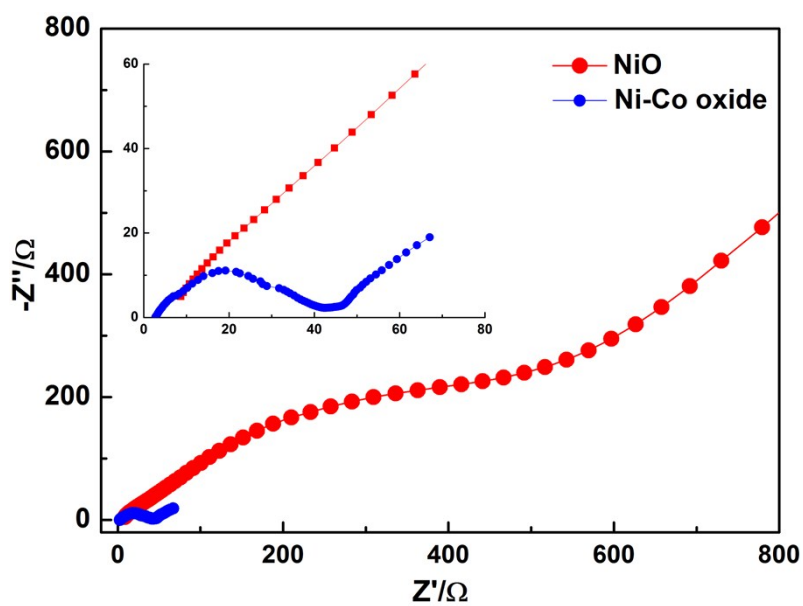

**Fig. S2.** Nyquist plots of Ni-Co oxide and pure NiO at as-prepared (before cycling).
